# Supplementary material for: MRSA Infections in HIV-Infected People Are Associated with Decreased MRSA-Specific Th1 Immunity
Source: PLOS journal article supplement (doi:10.1371/journal.ppat.1005580), 2016-04-19

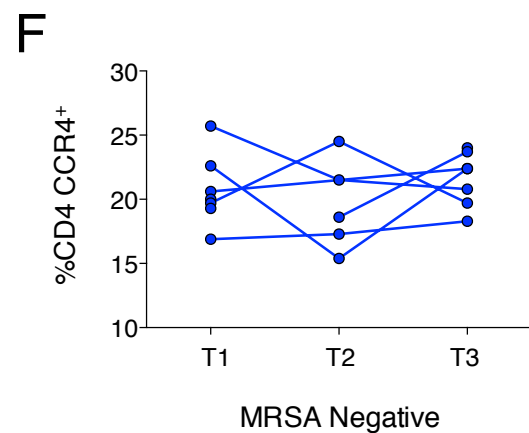

Supplement: S4 (10.1371/journal.ppat.1005580.s004) [file journal.ppat.1005580.s004]
